# Supplementary material
Source: PubMed Central journal article supplement (PMC6143058)
Supplement: jamapediatr-172-824-s002.pdf [file jamapediatr-172-824-s002.pdf]

# ClinicalTrials.gov *PRS*

## Protocol Registration and Results System

ID: AAUH190280 Weaning of Nasal Continuous Positive Airway Pressure (CPAP) in Premature Infants

NCT01721629

### PRS Review History

| Event   | User/Reviewer | Date/Time        |                                                                                                        |
|---------|---------------|------------------|--------------------------------------------------------------------------------------------------------|
| Publish | QA37          | 04/28/2017 14:28 |                                                                                                        |
| Release | CJensen       | 04/28/2017 03:58 |                                                                                                        |
| Publish | QA19          | 01/03/2017 10:46 |                                                                                                        |
| Release | CJensen       | 01/03/2017 09:47 |                                                                                                        |
| Publish | QA37          | 07/12/2016 17:19 |                                                                                                        |
| Release | CJensen       | 07/12/2016 15:47 |                                                                                                        |
| Publish | QA19          | 06/25/2015 06:31 |                                                                                                        |
| Release | CJensen       | 06/25/2015 05:20 |                                                                                                        |
| Publish | QA2           | 01/17/2014 09:38 |                                                                                                        |
| Release | CJensen       | 01/17/2014 03:03 |                                                                                                        |
| Publish | QA2           | 12/07/2012 09:06 |                                                                                                        |
| Release | CJensen       | 12/07/2012 07:31 |                                                                                                        |
| Publish | QA9           | 11/05/2012 07:49 |                                                                                                        |
| Release | CJensen       | 11/02/2012 05:14 |                                                                                                        |
| Release | CJensen       | 11/02/2012 05:11 |                                                                                                        |
| Reset   | QA9           | 09/26/2012 11:28 | <a href="#">Review Comments (1)</a><br>Viewed by CJensen 5 time(s) -- last access:<br>09/27/2012 04:01 |
| Release | CJensen       | 09/25/2012 05:24 |                                                                                                        |
